# Supplementary material for: Impact of aromatase inhibitor treatment on global gene expression and its association with antiproliferative response in ER+ breast cancer in postmenopausal patients
Source: PubMed Central journal article supplement (PMC6938628; doi:10.1186/s13058-019-1223-z), 2019-12-31
Supplement: 13058_2019_1223_MOESM9_ESM.pdf [file 13058_2019_1223_MOESM9_ESM.pdf]

| Pathways                                                   | #  | CDK2 | CCNE1 | BRCA1 | CCNE2 | CDK1 | CCND1 | CHEK1 | E2F2 | E2F5 | CCNB1 | CDC25A | CDC25C | CDK6 | SKP2 | CCNB2 | CCND2 | PPM1J | SFN | TGFB3 | MYC | PCNA | PLK1 | SMAD4 | CCNA2 | FANCD2 | RFC5,SLC19A1 | AURKA | BLM | CDKN2D | FAS | FOXO1 | FZD7 | HDAC11 | KAT2B | MSH6 | PKMYT1 | PRKCA | SMARCA4 | SUV39H1 | TGFB2 |  |  |  |  |  |  |  |  |
|------------------------------------------------------------|----|------|-------|-------|-------|------|-------|-------|------|------|-------|--------|--------|------|------|-------|-------|-------|-----|-------|-----|------|------|-------|-------|--------|--------------|-------|-----|--------|-----|-------|------|--------|-------|------|--------|-------|---------|---------|-------|--|--|--|--|--|--|--|--|
| Cell Cycle: G2/MDNA Damage Checkpoint Regulation           | 12 |      |       |       |       |      |       |       |      |      |       |        |        |      |      |       |       |       |     |       |     |      |      |       |       |        |              |       |     |        |     |       |      |        |       |      |        |       |         |         |       |  |  |  |  |  |  |  |  |
| Cell Cycle: G1/S Checkpoint Regulation                     | 17 |      |       |       |       |      |       |       |      |      |       |        |        |      |      |       |       |       |     |       |     |      |      |       |       |        |              |       |     |        |     |       |      |        |       |      |        |       |         |         |       |  |  |  |  |  |  |  |  |
| Cyclins and Cell Cycle Regulation                          | 19 |      |       |       |       |      |       |       |      |      |       |        |        |      |      |       |       |       |     |       |     |      |      |       |       |        |              |       |     |        |     |       |      |        |       |      |        |       |         |         |       |  |  |  |  |  |  |  |  |
| Estrogen-mediated S-phase Entry                            | 11 |      |       |       |       |      |       |       |      |      |       |        |        |      |      |       |       |       |     |       |     |      |      |       |       |        |              |       |     |        |     |       |      |        |       |      |        |       |         |         |       |  |  |  |  |  |  |  |  |
| Mitotic Roles of Polo-Like Kinase                          | 8  |      |       |       |       |      |       |       |      |      |       |        |        |      |      |       |       |       |     |       |     |      |      |       |       |        |              |       |     |        |     |       |      |        |       |      |        |       |         |         |       |  |  |  |  |  |  |  |  |
| Cell Cycle Control of Chromosomal Replication              | 2  |      |       |       |       |      |       |       |      |      |       |        |        |      |      |       |       |       |     |       |     |      |      |       |       |        |              |       |     |        |     |       |      |        |       |      |        |       |         |         |       |  |  |  |  |  |  |  |  |
| Aryl Hydrocarbon Receptor Signaling                        | 12 |      |       |       |       |      |       |       |      |      |       |        |        |      |      |       |       |       |     |       |     |      |      |       |       |        |              |       |     |        |     |       |      |        |       |      |        |       |         |         |       |  |  |  |  |  |  |  |  |
| GADD45 Signaling                                           | 9  |      |       |       |       |      |       |       |      |      |       |        |        |      |      |       |       |       |     |       |     |      |      |       |       |        |              |       |     |        |     |       |      |        |       |      |        |       |         |         |       |  |  |  |  |  |  |  |  |
| Role of BRCA1 in DNA Damage Response                       | 10 |      |       |       |       |      |       |       |      |      |       |        |        |      |      |       |       |       |     |       |     |      |      |       |       |        |              |       |     |        |     |       |      |        |       |      |        |       |         |         |       |  |  |  |  |  |  |  |  |
| Role of CHK Proteins in Cell Cycle Checkpoint Control      | 12 |      |       |       |       |      |       |       |      |      |       |        |        |      |      |       |       |       |     |       |     |      |      |       |       |        |              |       |     |        |     |       |      |        |       |      |        |       |         |         |       |  |  |  |  |  |  |  |  |
| Hereditary Breast Cancer Signaling                         | 14 |      |       |       |       |      |       |       |      |      |       |        |        |      |      |       |       |       |     |       |     |      |      |       |       |        |              |       |     |        |     |       |      |        |       |      |        |       |         |         |       |  |  |  |  |  |  |  |  |
| DNA damage-induced 14-3-3 $\sigma$ Signaling               | 8  |      |       |       |       |      |       |       |      |      |       |        |        |      |      |       |       |       |     |       |     |      |      |       |       |        |              |       |     |        |     |       |      |        |       |      |        |       |         |         |       |  |  |  |  |  |  |  |  |
| ATM Signaling                                              | 10 |      |       |       |       |      |       |       |      |      |       |        |        |      |      |       |       |       |     |       |     |      |      |       |       |        |              |       |     |        |     |       |      |        |       |      |        |       |         |         |       |  |  |  |  |  |  |  |  |
| Antiproliferative Role of TOB in T Cell Signaling          | 8  |      |       |       |       |      |       |       |      |      |       |        |        |      |      |       |       |       |     |       |     |      |      |       |       |        |              |       |     |        |     |       |      |        |       |      |        |       |         |         |       |  |  |  |  |  |  |  |  |
| Molecular Mechanisms of Cancer                             | 24 |      |       |       |       |      |       |       |      |      |       |        |        |      |      |       |       |       |     |       |     |      |      |       |       |        |              |       |     |        |     |       |      |        |       |      |        |       |         |         |       |  |  |  |  |  |  |  |  |
| Mismatch Repair in Eukaryotes                              | 3  |      |       |       |       |      |       |       |      |      |       |        |        |      |      |       |       |       |     |       |     |      |      |       |       |        |              |       |     |        |     |       |      |        |       |      |        |       |         |         |       |  |  |  |  |  |  |  |  |
| BER pathway                                                | 1  |      |       |       |       |      |       |       |      |      |       |        |        |      |      |       |       |       |     |       |     |      |      |       |       |        |              |       |     |        |     |       |      |        |       |      |        |       |         |         |       |  |  |  |  |  |  |  |  |
| p53 Signaling                                              | 9  |      |       |       |       |      |       |       |      |      |       |        |        |      |      |       |       |       |     |       |     |      |      |       |       |        |              |       |     |        |     |       |      |        |       |      |        |       |         |         |       |  |  |  |  |  |  |  |  |
| Cell Cycle Regulation by BTG Family Proteins               | 7  |      |       |       |       |      |       |       |      |      |       |        |        |      |      |       |       |       |     |       |     |      |      |       |       |        |              |       |     |        |     |       |      |        |       |      |        |       |         |         |       |  |  |  |  |  |  |  |  |
| Small Cell Lung Cancer Signaling                           | 12 |      |       |       |       |      |       |       |      |      |       |        |        |      |      |       |       |       |     |       |     |      |      |       |       |        |              |       |     |        |     |       |      |        |       |      |        |       |         |         |       |  |  |  |  |  |  |  |  |
| Breast Cancer Regulation by Stathmin1                      | 8  |      |       |       |       |      |       |       |      |      |       |        |        |      |      |       |       |       |     |       |     |      |      |       |       |        |              |       |     |        |     |       |      |        |       |      |        |       |         |         |       |  |  |  |  |  |  |  |  |
| Glioblastoma Multiforme Signaling                          | 9  |      |       |       |       |      |       |       |      |      |       |        |        |      |      |       |       |       |     |       |     |      |      |       |       |        |              |       |     |        |     |       |      |        |       |      |        |       |         |         |       |  |  |  |  |  |  |  |  |
| Factors Promoting Cardiogenesis in Vertebrates             | 8  |      |       |       |       |      |       |       |      |      |       |        |        |      |      |       |       |       |     |       |     |      |      |       |       |        |              |       |     |        |     |       |      |        |       |      |        |       |         |         |       |  |  |  |  |  |  |  |  |
| Role of Oct4 in Mammalian Embryonic Stem Cell Pluripotency | 1  |      |       |       |       |      |       |       |      |      |       |        |        |      |      |       |       |       |     |       |     |      |      |       |       |        |              |       |     |        |     |       |      |        |       |      |        |       |         |         |       |  |  |  |  |  |  |  |  |
| HIPPO signaling                                            | 4  |      |       |       |       |      |       |       |      |      |       |        |        |      |      |       |       |       |     |       |     |      |      |       |       |        |              |       |     |        |     |       |      |        |       |      |        |       |         |         |       |  |  |  |  |  |  |  |  |

**Additional file 9:  
Figure S6**
