# Supplementary material for: Impact of aromatase inhibitor treatment on global gene expression and its association with antiproliferative response in ER+ breast cancer in postmenopausal patients
Source: Springer Nature journal article supplement (doi:10.1186/s13058-019-1223-z), 2019-12-31
Supplement: MOESM3 [file 23393666]

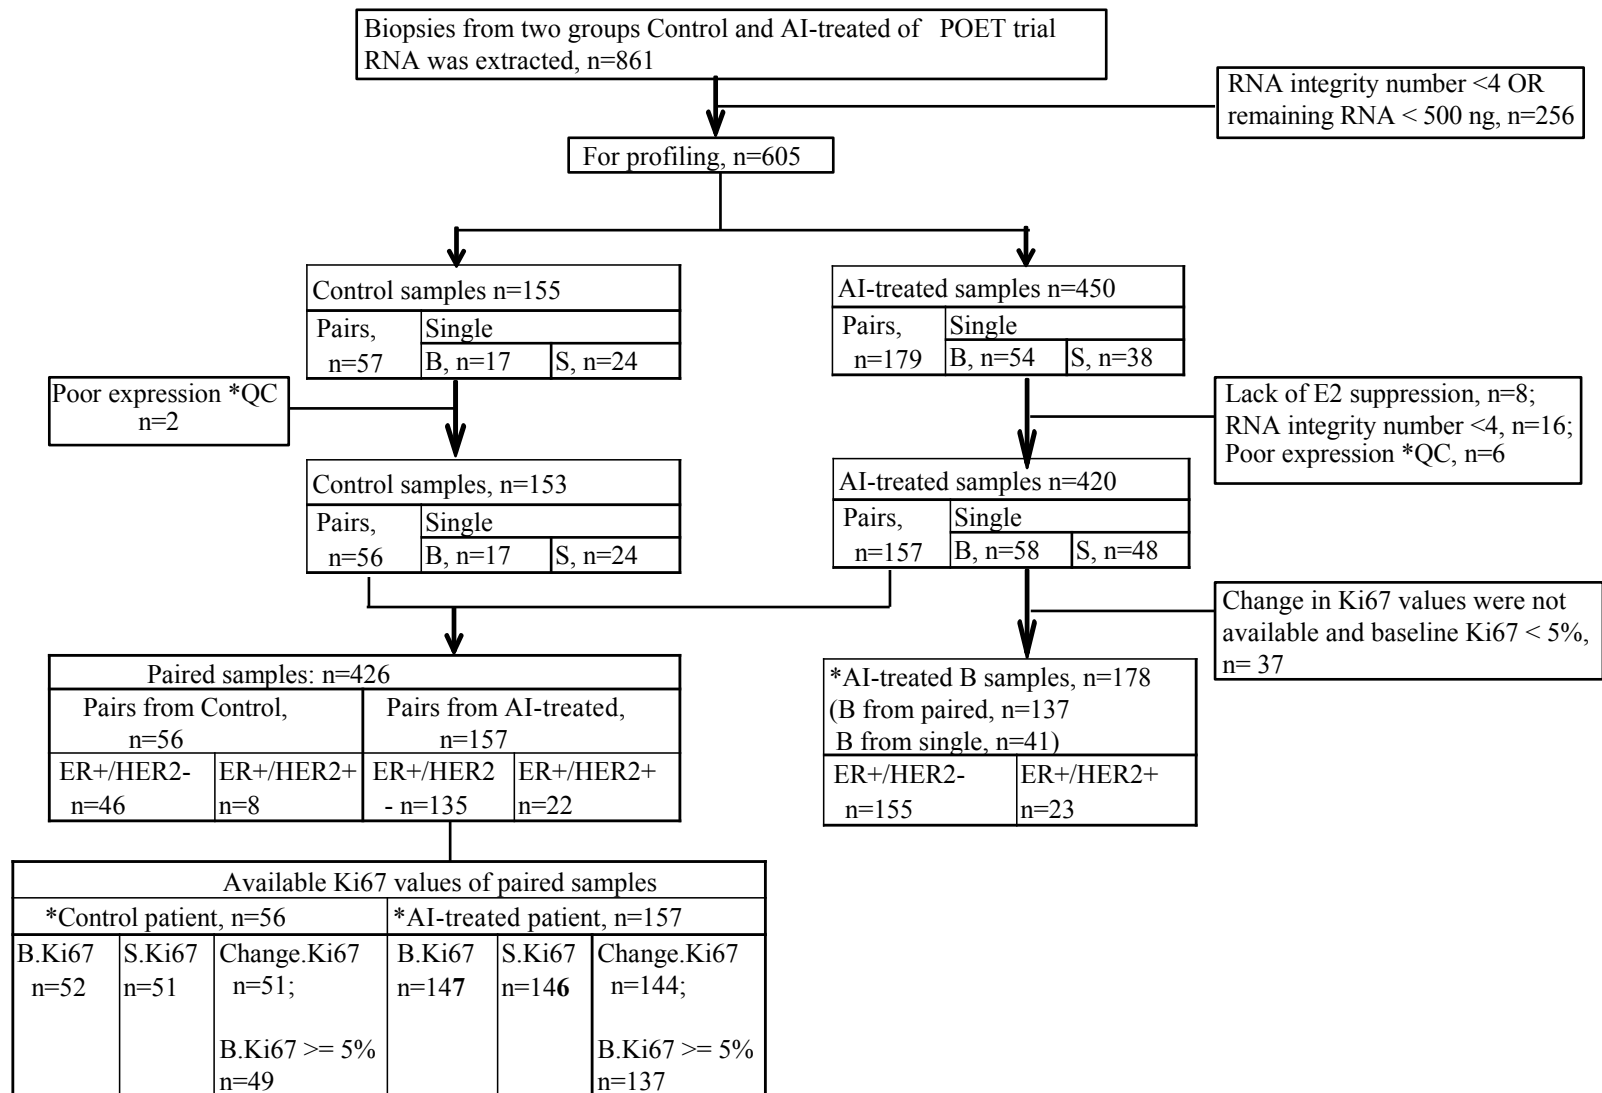

- \* Number of patients' data used in the study from
- no presurgical treatment group, n = 56
  - 2 week's presurgical AI group : n = 198 (157 + 41)

**Additional file 3:  
Figure S1**
