# Supplementary material for: Impact of aromatase inhibitor treatment on global gene expression and its association with antiproliferative response in ER+ breast cancer in postmenopausal patients
Source: Springer Nature journal article supplement (doi:10.1186/s13058-019-1223-z), 2019-12-31
Supplement: MOESM5 [file 23393666]

**a** POETIC HER2- (n=155) baselineESR1 change in Ki67

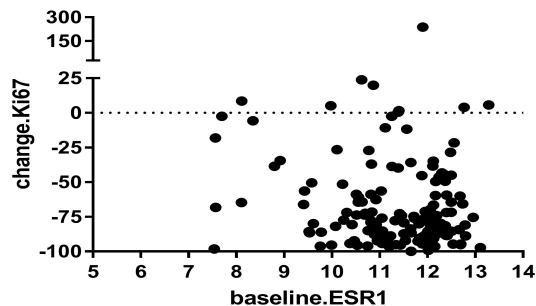

|                               | baseline.ESR1 vs. change.Ki67 |
|-------------------------------|-------------------------------|
| Spearman r                    |                               |
| r                             | -0.1099                       |
| 95% confidence interval       | -0.2673 to 0.0533             |
| P value                       |                               |
| P (two-tailed)                | 0.1735                        |
| P value summary               | ns                            |
| Exact or approximate P value? | Approximate                   |
| Significant? (alpha = 0.05)   | No                            |
| Number of XY Pairs            | 155                           |

**b** POETIC HER2- (n=155) baselineESR1 residual Ki67

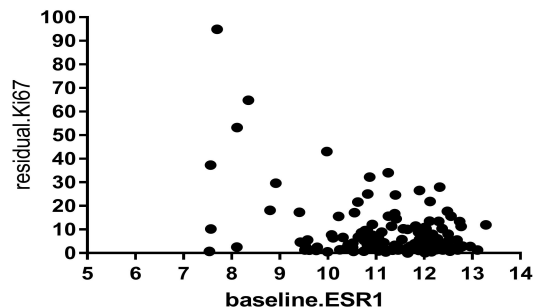

|                               | baseline.ESR1 vs. residual.Ki67 |
|-------------------------------|---------------------------------|
| Spearman r                    |                                 |
| r                             | -0.1558                         |
| 95% confidence interval       | -0.3102 to 0.00657              |
| P value                       |                                 |
| P (two-tailed)                | 0.0529                          |
| P value summary               | ns                              |
| Exact or approximate P value? | Approximate                     |
| Significant? (alpha = 0.05)   | No                              |
| Number of XY Pairs            | 155                             |

**c** POETIC HER2+ (n=23) baselineESR1 change in Ki67

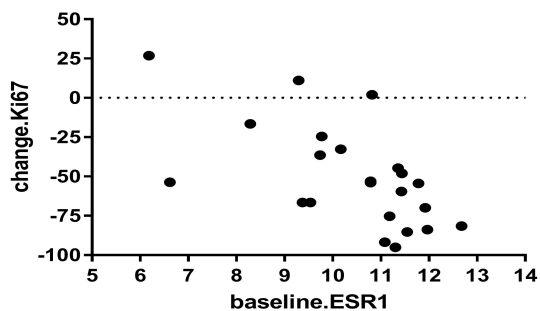

|                               | baseline.ESR1 vs. change.Ki67 |
|-------------------------------|-------------------------------|
| Spearman r                    |                               |
| r                             | -0.6077                       |
| 95% confidence interval       | -0.8199 to -0.2487            |
| P value                       |                               |
| P (two-tailed)                | 0.0021                        |
| P value summary               | **                            |
| Exact or approximate P value? | Approximate                   |
| Significant? (alpha = 0.05)   | Yes                           |
| Number of XY Pairs            | 23                            |

**d** POETIC HER2+ (n=23) baselineESR1 residual Ki67

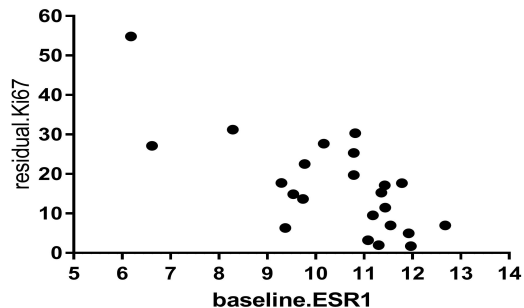

|                               | baseline.ESR1 vs. residual.Ki67 |
|-------------------------------|---------------------------------|
| Spearman r                    |                                 |
| r                             | -0.6156                         |
| 95% confidence interval       | -0.824 to -0.2605               |
| P value                       |                                 |
| P (two-tailed)                | 0.0018                          |
| P value summary               | **                              |
| Exact or approximate P value? | Approximate                     |
| Significant? (alpha = 0.05)   | Yes                             |
| Number of XY Pairs            | 23                              |

**Additional file 5:  
Figure S3**
