# Supplementary material for: Impact of aromatase inhibitor treatment on global gene expression and its association with antiproliferative response in ER+ breast cancer in postmenopausal patients
Source: Springer Nature journal article supplement (doi:10.1186/s13058-019-1223-z), 2019-12-31
Supplement: MOESM10 [file 23393666]

S.HER2neg

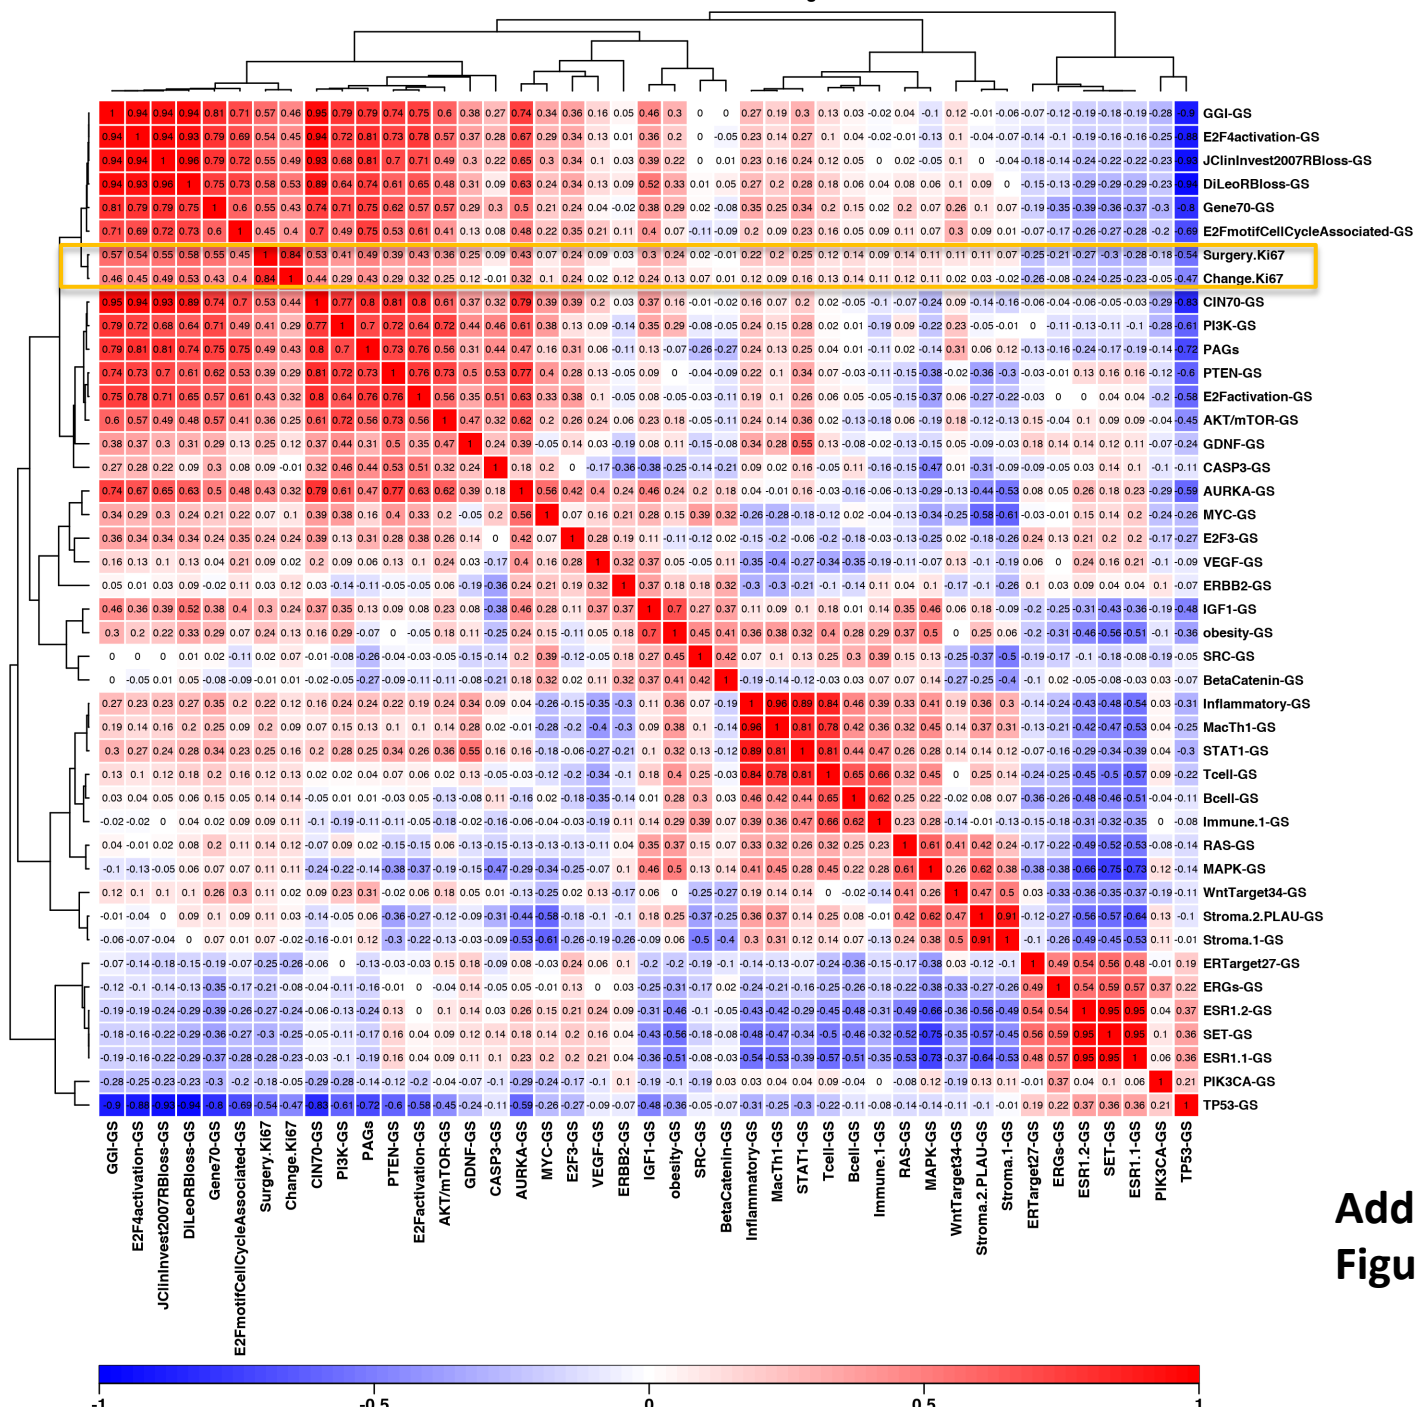

Features = 43

Additional file 10:  
Figure S7a

S.HER2pos

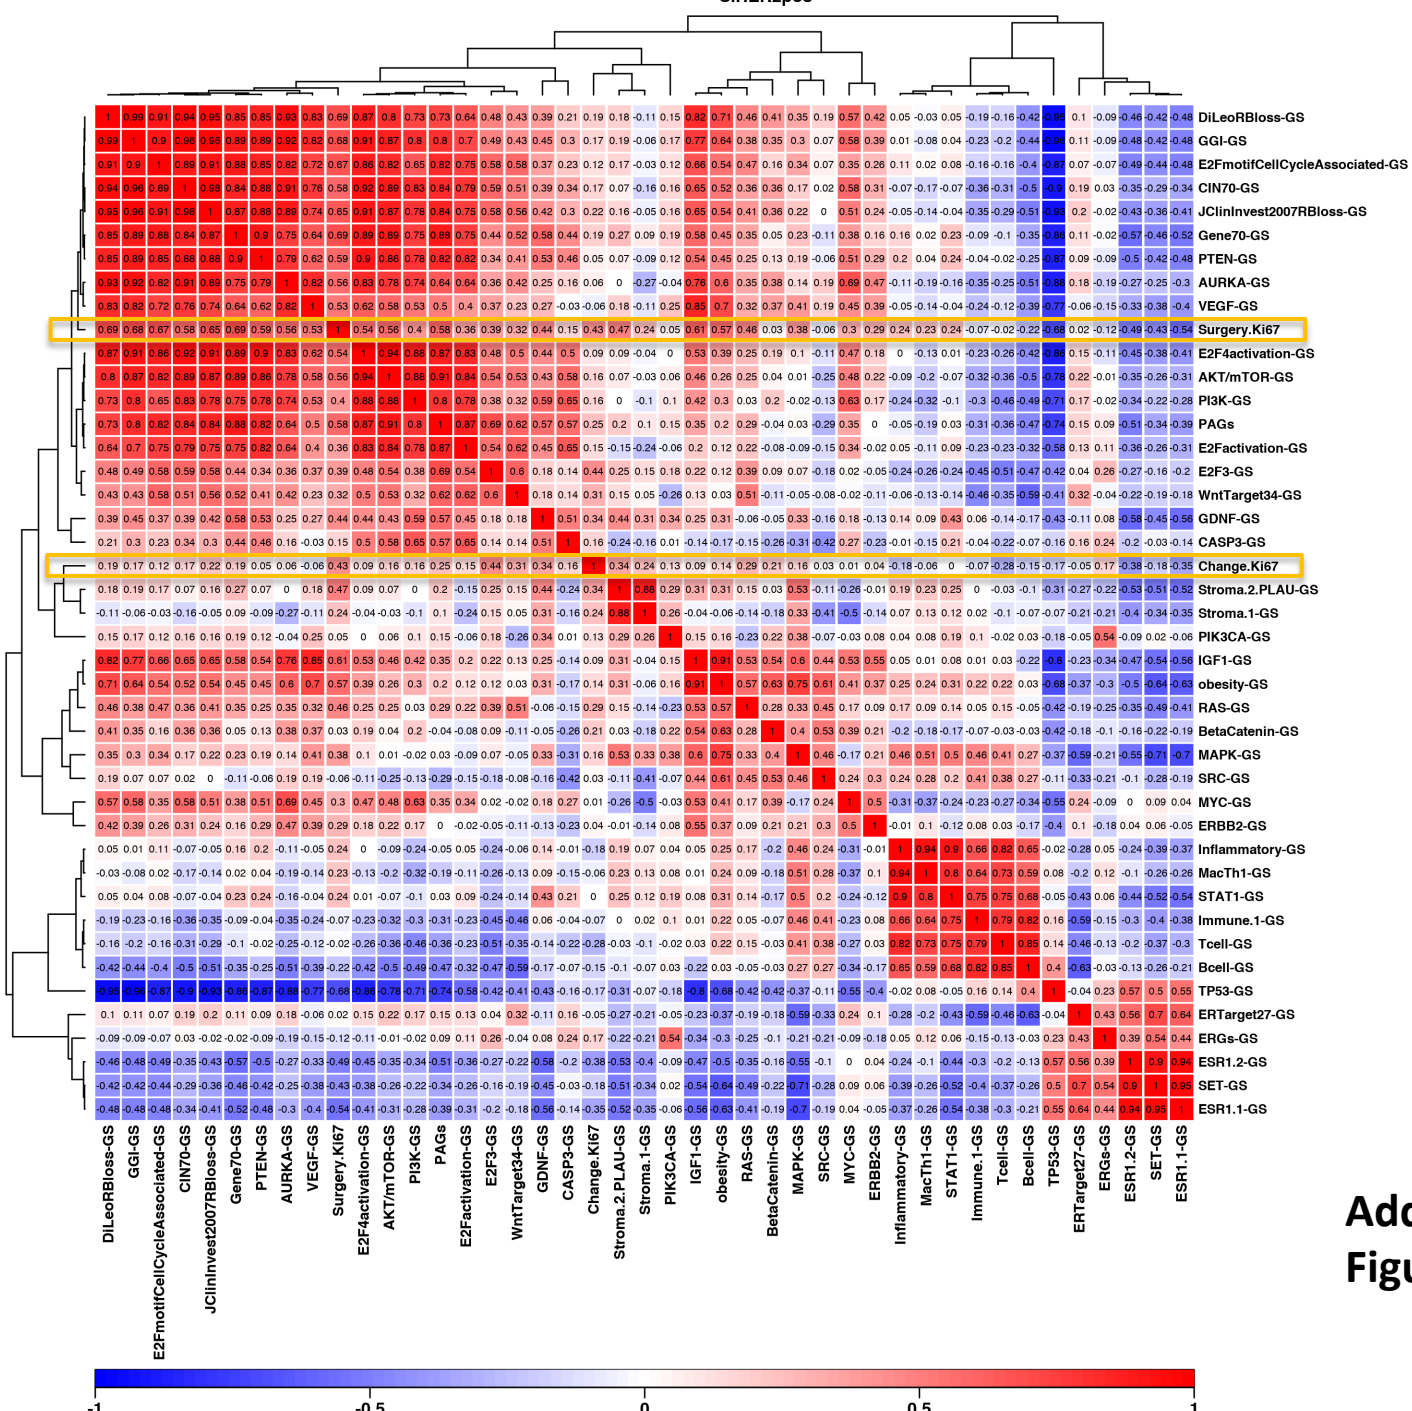

Features = 43

Additional file 10:  
Figure S7b
